# Supplementary material for: The influence of triplet energy levels of bridging ligands on energy transfer processes in Ir(iii)/Eu(iii) dyads
Source: Royal Society of Chemistry journal article supplement (doi:10.1039/c1dt10968e), 2011-01-01
Supplement: c1dt10968e.pdf [file c1dt10968e.pdf]

# The Influence of the Triplet Energy Levels of Bridging Ligands on the Energy Transfer Process in Ir(III)/Eu(III) Dyads

Weili Jiang,<sup>a</sup> Bin Lou,<sup>a</sup> Jianqiang Wang,<sup>b</sup> Hongbin Lv,<sup>a</sup> Zuqiang Bian<sup>\*a</sup> and Chunhui Huang<sup>a</sup>

<sup>a</sup> Beijing National Laboratory for Molecular Sciences, State Key Laboratory of Rare Earth Materials Chemistry and Applications, College of Chemistry and Molecular Engineering, Peking University, Beijing 100871, China; <sup>b</sup> Shanghai Synchrotron Radiation Facility, Shanghai Institute of Applied Physics, Chinese Academy of Sciences, Shanghai 201204, P. R. China

**Table S1** Fit parameters of Eu EXAFS spectrum for complex **5e**

|           | Shell | N <sup>[a]</sup> | R <sup>[b]</sup> | $\sigma^2$ (10 <sup>-3</sup> Å <sup>2</sup> ) <sup>[c]</sup> | $\Delta E_0$ (eV) <sup>[d]</sup> |
|-----------|-------|------------------|------------------|--------------------------------------------------------------|----------------------------------|
| <b>5e</b> | Eu-O  | 6.8±1.3          | 2.41±0.02        | 9.4±1.8                                                      | 3.6±0.8                          |
|           | Eu-Cl | 1.2±0.1          | 2.62±0.02        | 17.7±2.0                                                     | 5.4±0.9                          |

[a] Coordination number; [b] Distance between absorber and backscatterer atoms; [c] Debye–Waller factor; [d] Inner potential correction.

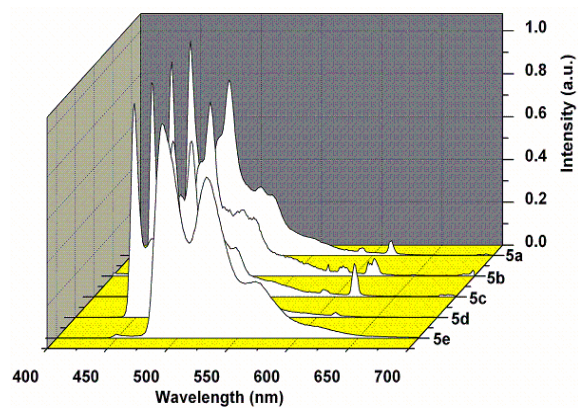

**Fig. S1.** Emission spectra of complexes **5a-5e** at 77 K in EtOH glass.

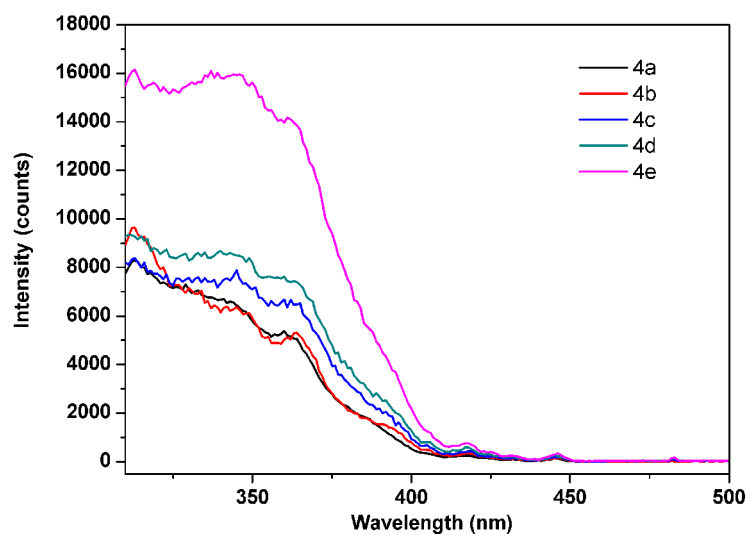

**Fig. S2.** Excitation spectra of **4a-4e** with  $\text{EuCl}_3 \cdot 6\text{H}_2\text{O}$  (1:1,  $1 \times 10^{-5}$  M) at 77 K in EtOH glass tracking the 613 nm emission of  $\text{Eu}^{3+}$ .
